# Supplementary material for: Efficient photocatalytic carbon monoxide production from ammonia and carbon dioxide by the aid of artificial photosynthesis
Source: Royal Society of Chemistry journal article supplement (doi:10.1039/c7sc01851g), 2017-01-01
Supplement: c7sc01851g1.pdf [file c7sc01851g1.pdf]

## Supporting information

### **Efficient photocatalytic carbon monoxide production from ammonia and carbon dioxide by the aid of artificial photosynthesis**

Zeai Huang,<sup>a</sup> Kentaro Teramura,<sup>a,b\*</sup> Hiroyuki Asakura,<sup>a,b</sup> Saburo Hosokawa,<sup>a,b</sup> Tsunehiro Tanaka<sup>a,b\*</sup>

<sup>a</sup>Department of Molecular Engineering, Graduate School of Engineering, Kyoto University, Kyoto 615-8510, Japan

<sup>b</sup>Elements Strategy Initiative for Catalysts and Batteries, Kyoto University, Kyoto 615-8510, Japan

#### **Corresponding Author**

\*Dr. Kentaro Teramura. Tel: +81-75-383-2559, Fax: +81-75-383-2561, E-mail address: teramura@moleng.kyoto-u.ac.jp;

\*Professor Tsunehiro Tanaka. Tel: +81-75-383-2558, Fax: +81-75-383-2561, E-mail address: tanakat@moleng.kyoto-u.ac.jp

## Experiment section

### Catalysts preparation

$\text{Sr}_{1.6}\text{K}_{0.35}\text{Na}_{1.45}\text{Ta}_5\text{O}_{15}$  was fabricated using a flux method. KCl (99.8%, Wako) and NaCl (99.9%, Wako) in a molar ratio of 55:45 were used as flux. A stoichiometric mixture of  $\text{K}_2\text{CO}_3$  (99.5%, Wako),  $\text{SrCO}_3$  (99.9%, Wako), and  $\text{Ta}_2\text{O}_5$  (99.9%, Kojundo) was ground with flux in an  $\text{Al}_2\text{O}_3$  mortar for 5 min. The total mass ratio of flux to precursors ( $\text{K}_2\text{CO}_3$ ,  $\text{SrCO}_3$ , and  $\text{Ta}_2\text{O}_5$ ) was fixed at 1.0. The mixture was transferred to a 50 mL  $\text{Al}_2\text{O}_3$  crucible and calcined at 1173 K for 3 h in air. After cooling to room temperature, the mixture was washed three times with distilled water at 358 K, to remove any residual salts, then dried in air at 353 K. Elemental analysis was conducted using ICP-OES (iCAP7400 Duo, Thermo Fisher Scientific, Inc.) to determine the chemical formula of the catalyst;  $\text{Sr}_{1.6}\text{K}_{0.35}\text{Na}_{1.45}\text{Ta}_5\text{O}_{15}$ . Other photocatalysts were fabricated according to the reported papers in our previous works.<sup>1-4</sup> The Ag cocatalyst was deposited onto the fabricated samples using a chemical reduction method. Specifically, an aqueous  $\text{NaPH}_2\text{O}_2$  solution (0.33 M) was added to a 50-mL suspension containing the photocatalyst (1.5 g) and  $\text{AgNO}_3$  (0.1 M). After stirring at 358 K for 1.5 h, the suspension was filtered and the catalyst was dried in air at room temperature before use.

### Characterization

The structures and crystallinities of the samples were characterized by X-ray diffraction (XRD) using a Rigaku Multiflex powder X-ray diffractometer. SEM images were obtained using a field emission scanning electron microscope (FE-SEM, SU-8220, Hitachi High-Technologies). The XPS measurement was acquired using an X-ray photoelectron spectrometer (ESCA 3400, Shimadzu Corp.), and calibrated by the peak that can be assigned to C 1s.

### Photocatalytic activity test

Photocatalytic conversions of CO<sub>2</sub> by H<sub>2</sub>O were carried out in a flow system using an inner-irradiation-type reaction vessel at room temperature and ambient pressure. The photocatalyst (0.5 g) was dispersed in aqueous solution (1.0 L) with different additives, and CO<sub>2</sub> gas (99.999%) was bubbled into the solution at a flow rate of 30 mL min<sup>-1</sup>. The suspension was irradiated using a 400 W high-pressure Hg lamp with a quartz filter connected to a water cooling system. The gaseous products generated in the reaction (such as H<sub>2</sub>, O<sub>2</sub>, N<sub>2</sub>, and CO) were analyzed by thermal conductivity detector-gas chromatography (TCD-GC) using a GC-8A chromatograph (Shimadzu Corp.) equipped with a Molecular Sieve 5A column using Ar as the carrier gas, and by flame ionization detector-gas chromatography (FID-GC) with a methanizer and a ShinCarbon ST column using N<sub>2</sub> as the carrier gas. In the isotopic experiment, <sup>12</sup>CO<sub>2</sub> gas was replaced with <sup>13</sup>CO<sub>2</sub>. The formation of <sup>13</sup>CO and <sup>12</sup>CO was analyzed using a quadrupole mass spectrometer (BEL Japan, Inc., BEL Mass) combined with TCD-GC using Ar as the carrier gas.

### Calculation of selectivity toward CO evolution and consumed $e^-/h^+$

In a photocatalytic reaction, charge separation takes place inside a bulk of photocatalyst, in which electron and hole pairs are generated. Electrons and holes that are not deactivated by recombination move separately to the surface of the photocatalyst. As a result, reduction and oxidation occur at the surface electrons and holes, respectively.

#### ✓ Reduction process

Two reduction reactions take place in our system: (1) reduction of CO<sub>2</sub> into CO and (2) production of H<sub>2</sub> for the photocatalytic conversion of CO<sub>2</sub> by H<sub>2</sub>O. These are both 2-electrons reduction processes, as shown below.

- Reduction of CO<sub>2</sub>:  $\text{CO}_2 + 2\text{H}^+ + 2\text{e}^- \rightarrow \text{CO} + \text{H}_2\text{O}$  (1)
- Production of H<sub>2</sub>:  $2\text{H}^+ + 2\text{e}^- \rightarrow \text{H}_2$  (2)

In the photocatalytic conversion of CO<sub>2</sub> by H<sub>2</sub>O, H<sub>2</sub> can be produced from water splitting, which competes with the reduction of CO<sub>2</sub>. However, this H<sub>2</sub> production is not a favorable reaction. Therefore, the fraction of electrons used for the reduction of CO<sub>2</sub> should be considered. The selectivity of the generated electrons toward CO evolution can be calculated using Eq. 3.

$$\text{Selectivity (\%)} = 100 \times 2R_{\text{CO}} / (2R_{\text{CO}} + 2R_{\text{H}_2}) \quad (3)$$

where  $R_{\text{CO}}$  and  $R_{\text{H}_2}$  represent the formation rates of CO and H<sub>2</sub>, respectively.

#### ✓ **Oxidation process**

Generally, O<sub>2</sub> is generated when H<sub>2</sub>O functions as an electron donor, as in Eq. 4.

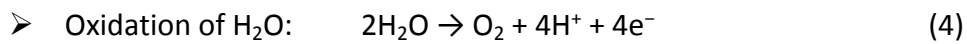

The oxidation of H<sub>2</sub>O is a typical 4-electron oxidation process. We found that NH<sub>3</sub> and/or NH<sub>4</sub><sup>+</sup> functioned as electron donors in our system, as shown below.

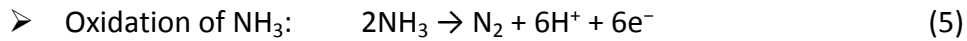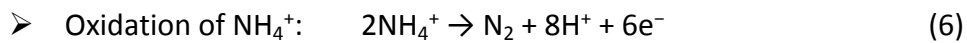

Six electrons are produced in the oxidation of either NH<sub>3</sub> or NH<sub>4</sub><sup>+</sup> to N<sub>2</sub>. Thus, six holes should be consumed. The formations of H<sub>2</sub> and CO are both 2-electron reduction processes, as shown in Eqs. 1 and 2. Thus, the ratio of electrons consumed by holes can be calculated from the formation rates of each gas, as shown below.

$$\text{Consumed } e^-/h^+ = (2R_{\text{CO}} + 2R_{\text{H}_2}) / (4R_{\text{O}_2} + 6R_{\text{N}_2})$$

where  $R_{\text{CO}}$ ,  $R_{\text{H}_2}$ ,  $R_{\text{O}_2}$ , and  $R_{\text{N}_2}$  represent the formation rates of CO, H<sub>2</sub>, O<sub>2</sub>, and N<sub>2</sub>, respectively. The number of electrons generated by charge transfer is strictly equal to that of holes. When the photocatalytic reaction proceeds stoichiometrically, the ratio of electrons to holes will be equal to 1 ( $e^-/h^+ = 1$ ).

#### ✓ **Total process**

The total chemical formulae in cases where only NH<sub>3</sub> or NH<sub>4</sub><sup>+</sup> acts as the electron donor (therefore, O<sub>2</sub> is not evolved) are as follows:

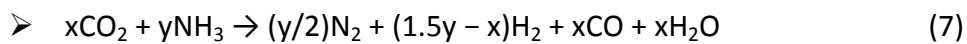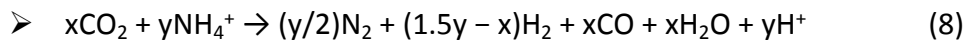

For example, if no H<sub>2</sub> is generated, 1 mol of N<sub>2</sub>, 3 mol of CO, and 3 mol of H<sub>2</sub>O will be generated from 2 mol of CO<sub>2</sub> and 3 mol of NH<sub>3</sub> or NH<sub>4</sub><sup>+</sup>. The ratio of H<sub>2</sub> to CO (H<sub>2</sub>/CO) can be controlled by tuning the decomposition of NH<sub>3</sub> or NH<sub>4</sub><sup>+</sup> in the photocatalytic system, for instance, by changing the concentration of NH<sub>4</sub>HCO<sub>3</sub>.

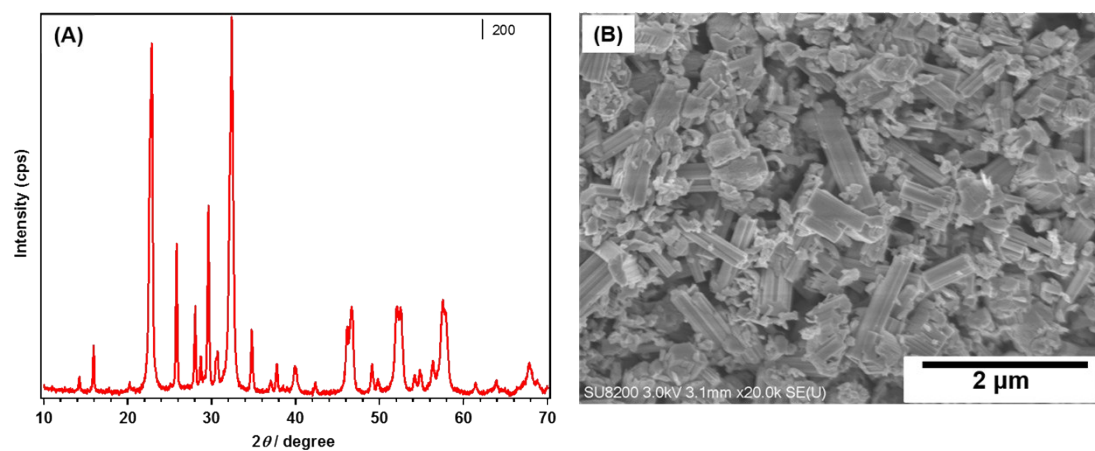

Figure S1 XRD pattern (A) and SEM image (B) of  $\text{Sr}_{1.6}\text{K}_{0.35}\text{Na}_{1.45}\text{Ta}_5\text{O}_{15}$  prepared using a modified flux method and calcined at 1173 K for 3 h.

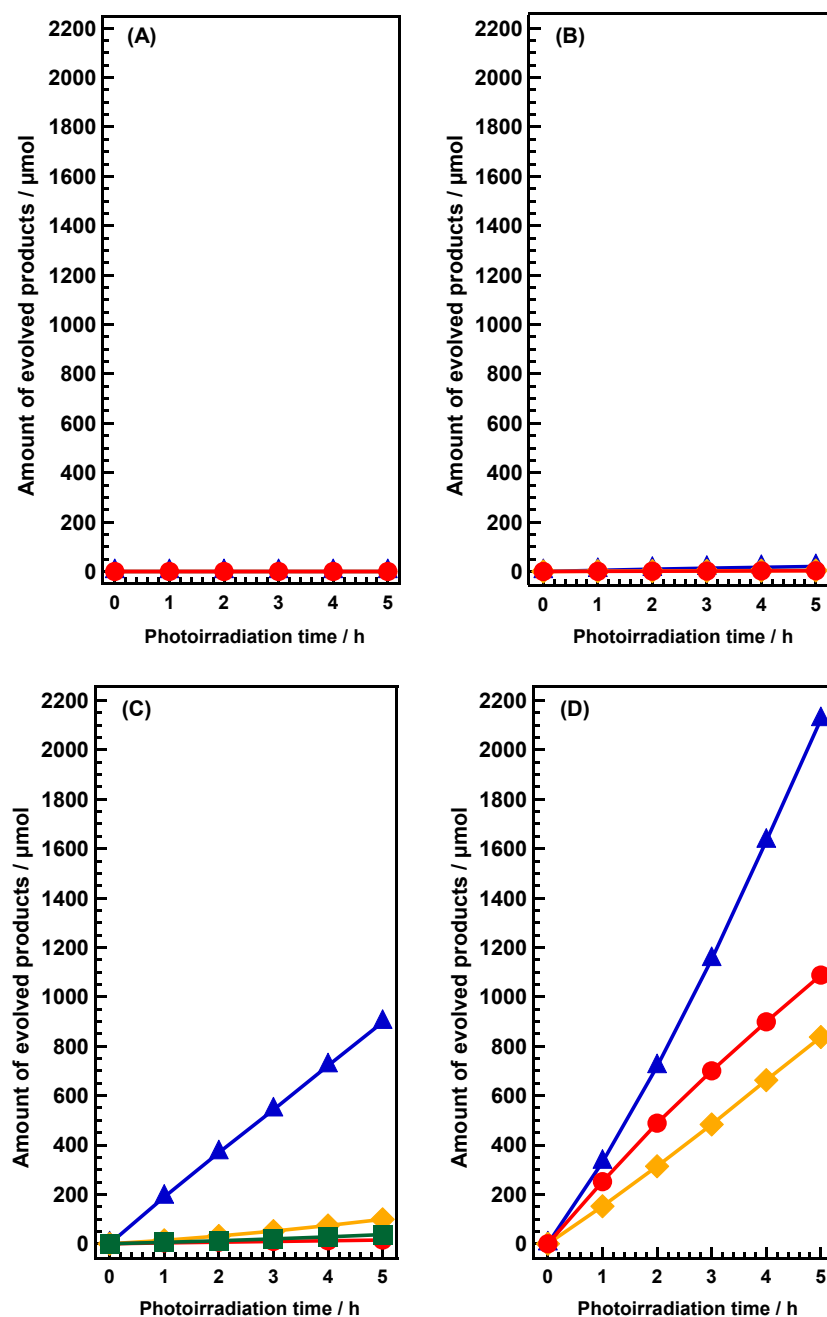

Figure S2 Time courses of CO (circle), O<sub>2</sub> (square), N<sub>2</sub> (lozenge), and H<sub>2</sub> (triangle) evolutions during the photocatalytic conversion of CO<sub>2</sub> over Ag-modified Sr<sub>1.6</sub>K<sub>0.35</sub>Na<sub>1.45</sub>Ta<sub>5</sub>O<sub>15</sub>. (A) Without photocatalyst, (B) without photoirradiation, (C) without Ag cocatalyst, and (D) without CO<sub>2</sub> flow.

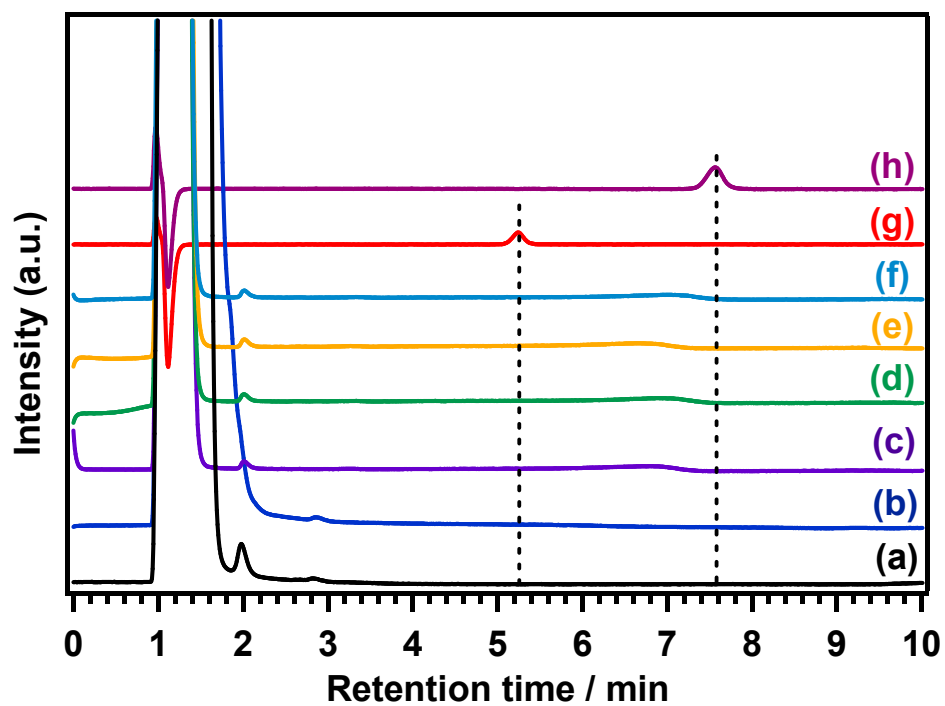

Figure S3 HPLC chromatograms of reaction solutions after photoirradiation for (a) 0.5 h, (b) 1.0 h, (c) 2.0 h, (d) 3.0 h, (e) 4.0 h, and (f) 5.0 h over 1.0 wt.% Ag-modified  $\text{Sr}_{1.6}\text{K}_{0.35}\text{Na}_{1.45}\text{Ta}_5\text{O}_{15}$ . (g) and (h) are 100 ppm  $\text{NaNO}_3$  and  $\text{NaNO}_2$ , respectively.

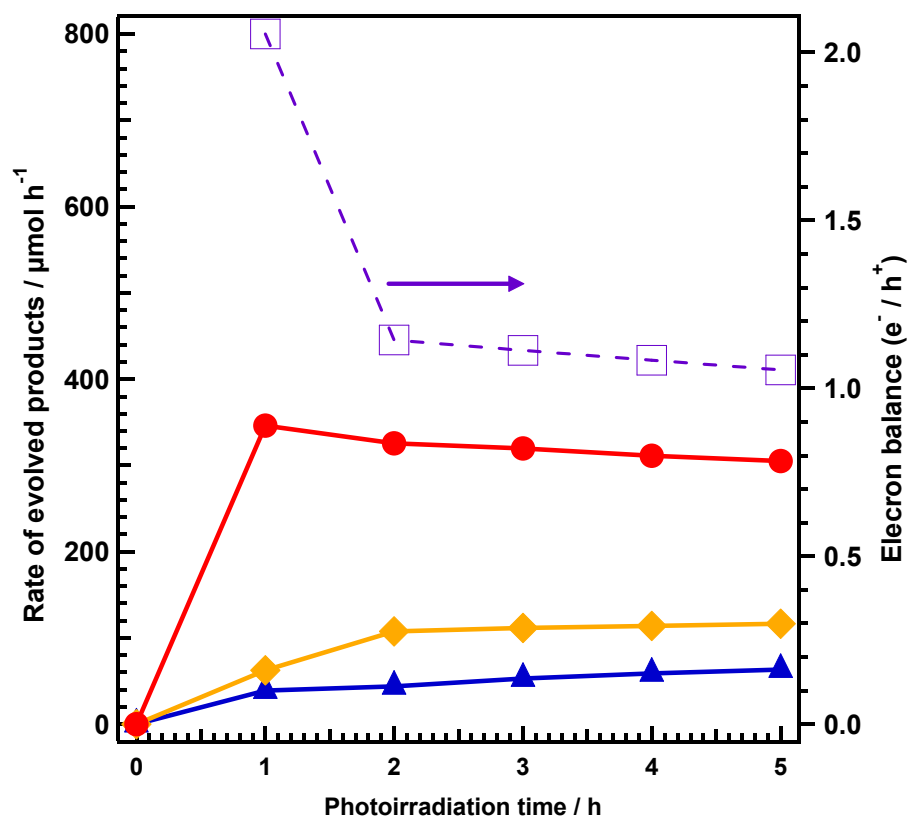

Figure S4 Time course of CO (circle), N<sub>2</sub> (lozenge), and H<sub>2</sub> (triangle) evolutions and electron balance ( $e^-/h^+$ ) (square) during the photocatalytic conversion of CO<sub>2</sub> over 1.0 wt.% Ag-modified Sr<sub>1.6</sub>K<sub>0.35</sub>Na<sub>1.45</sub>Ta<sub>5</sub>O<sub>15</sub>.



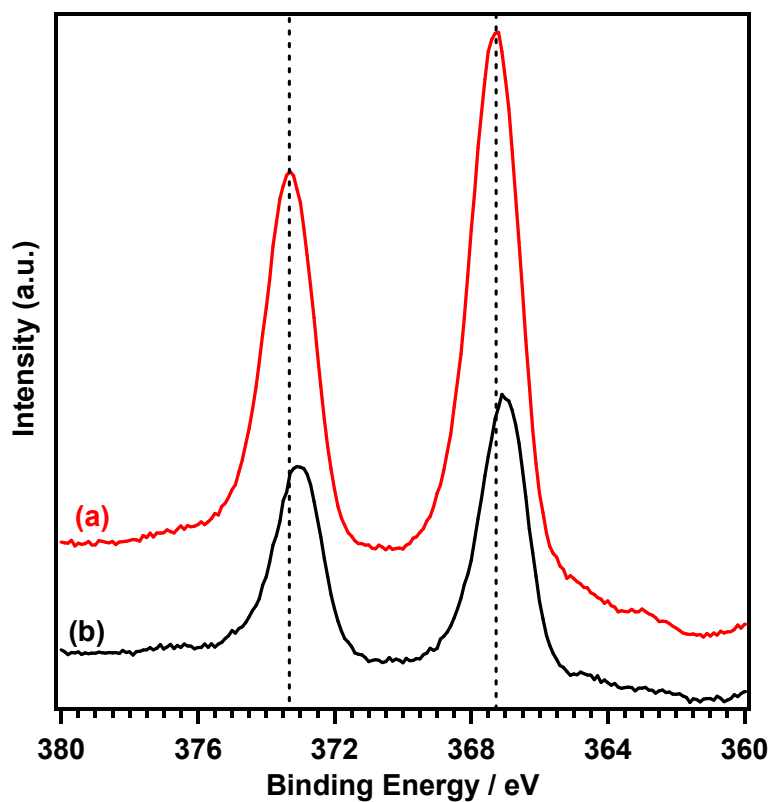

Figure S5 X-ray photoelectron spectra of Ag3d before (a) and after (b) the photocatalytic conversion of CO<sub>2</sub> over Sr<sub>1.6</sub>K<sub>0.35</sub>Na<sub>1.45</sub>Ta<sub>5</sub>O<sub>15</sub>.

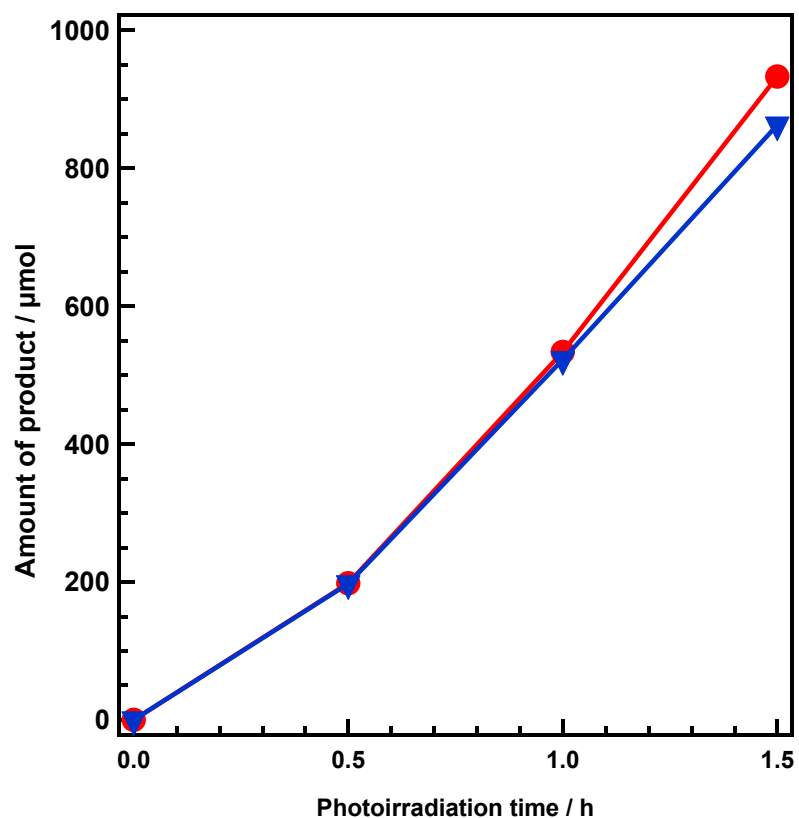

Figure S6 Time course of CO (circle) and <sup>13</sup>CO (triangle) determined by FID-GC and MS, respectively, during the photocatalytic conversion of CO<sub>2</sub> over 5.0 wt.% Ag-modified Sr<sub>1.6</sub>K<sub>0.35</sub>Na<sub>1.45</sub>Ta<sub>5</sub>O<sub>15</sub>.

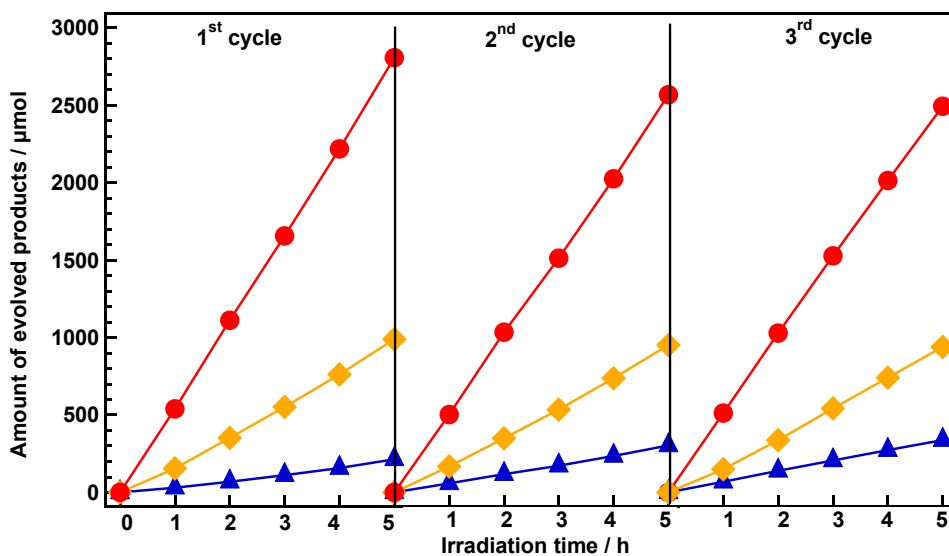

Figure S7 Time course of CO (circle), N<sub>2</sub> (lozenge), and H<sub>2</sub> (triangle) evolutions during three cycles of the photocatalytic conversion of CO<sub>2</sub> over Ag-modified Sr<sub>1.6</sub>K<sub>0.35</sub>Na<sub>1.45</sub>Ta<sub>5</sub>O<sub>15</sub>. Amount of catalyst: 0.5 g; cocatalyst loading: 5.0 wt.% Ag; light source: 400 W high-pressure Hg lamp; water volume: 1.0 L; CO<sub>2</sub> flow rate: 30 mL min<sup>-1</sup>; additive: 0.5 M NH<sub>4</sub>HCO<sub>3</sub>.

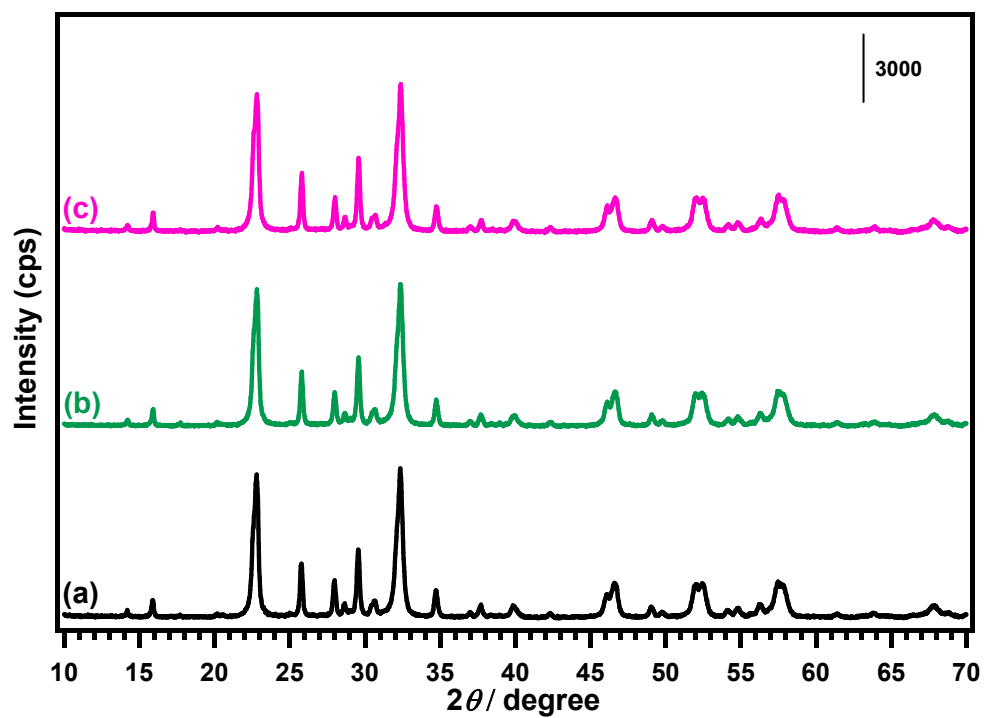

Figure S8 XRD patterns of  $\text{Sr}_{1.6}\text{K}_{0.35}\text{Na}_{1.45}\text{Ta}_5\text{O}_{15}$  after (a) first, (b) second and (c) third cycle.

## References

1. Wang, Z.; Teramura, K.; Hosokawa, S.; Tanaka, T., *Appl Catal B-Environ* **2015**, *163*, 241-247.
2. Teramura, K.; Tatsumi, H.; Wang, Z.; Hosokawa, S.; Tanaka, T., *Bulletin of the Chemical Society of Japan* **2015**, *88* (3), 431-437.
3. Teramura, K.; Wang, Z.; Hosokawa, S.; Sakata, Y.; Tanaka, T., *Chemistry—A European Journal* **2014**, *20* (32), 9906-9909.
4. Wang, Z.; Teramura, K.; Hosokawa, S.; Tanaka, T., *J. Mater. Chem. A* **2015**, *3* (21), 11313-11319.
